# Supplementary material for: Novel electrically-conductive electro-responsive hydrogels for smart actuators with a carbon-nanotube-enriched three-dimensional conductive network and a physical-phase-type three-dimensional interpenetrating network
Source: Royal Society of Chemistry journal article supplement (doi:10.1039/c9tc04428k), 2020-01-01
Supplement: c9tc04428k1.pdf [file c9tc04428k1.pdf]

# Novel Electric-Conductive Electro-Responsive Hydrogels for Smart Actuators with Unique Three-Dimensional CNTs-Enriched Conductive Network and Physical-Phase Interpenetrating Network

Zongrong Ying,\* Qi Wang, Jie Xie, Bo Li, Xuemei Lin, Shengjie Hui

Department of Materials Science and Engineering, School of Chemical Engineering, Nanjing University of Science and Technology, Nanjing 210094, China.

## SUPPORTING INFORMATION

**Table S1** comparison on mole fractions of the AA and AMPS segments within P(AMPS-co-AA) for four as-polymerized samples.

| Sample               | $C_{AA}$ (%) | $C_{AMPS}$ (%) | $F_{AA}$ (%) | $F_{AMPS}$ (%) |
|----------------------|--------------|----------------|--------------|----------------|
| Pure P(AMPS-co-AA)   | 93.5         | 87.0           | 90.6         | 9.4            |
| P(AMPS-co-AA)/NF     | 88.2         | 78.3           | 91.0         | 9.0            |
| P(AMPS-co-AA)/Na-MMT | 96.7         | 91.3           | 90.5         | 9.5            |
| P(AMPS-co-AA)/CNT    | 94.4         | 96.7           | 89.8         | 10.2           |

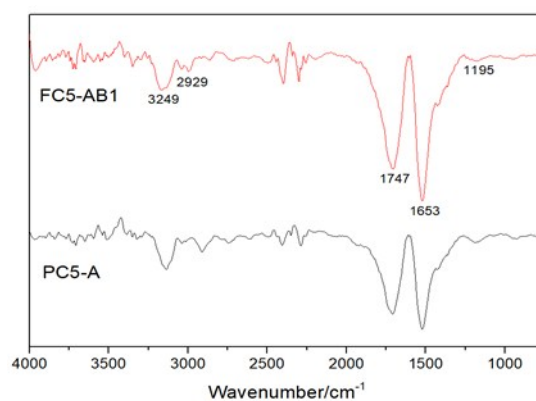

Figure S1 FTIR spectrums of FC5-AB1 and PC5-A hydrogels.

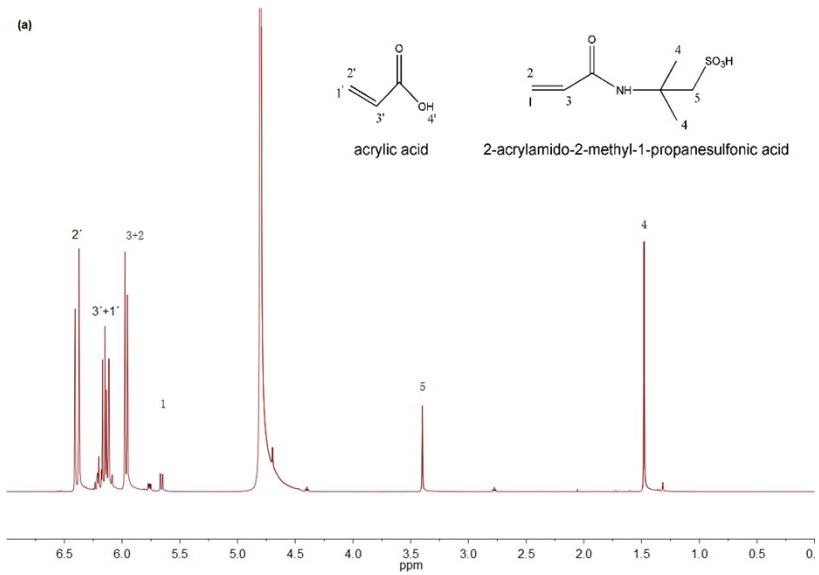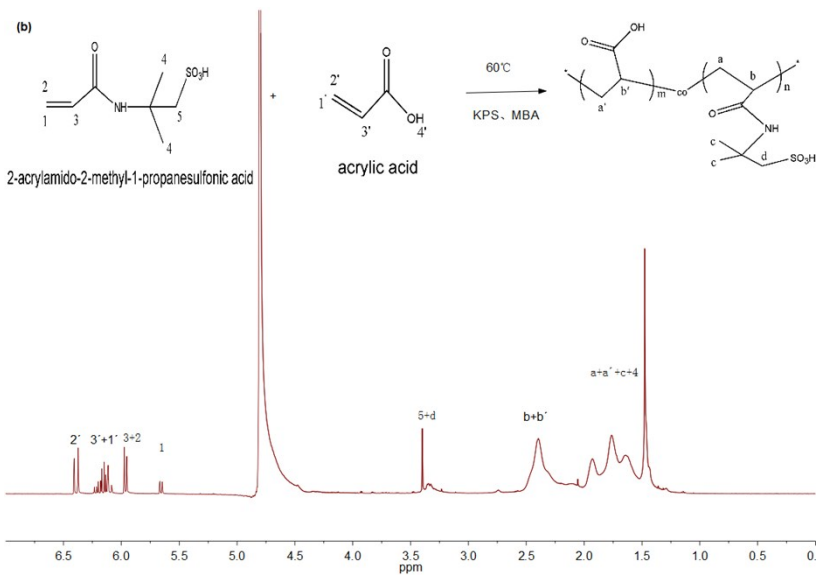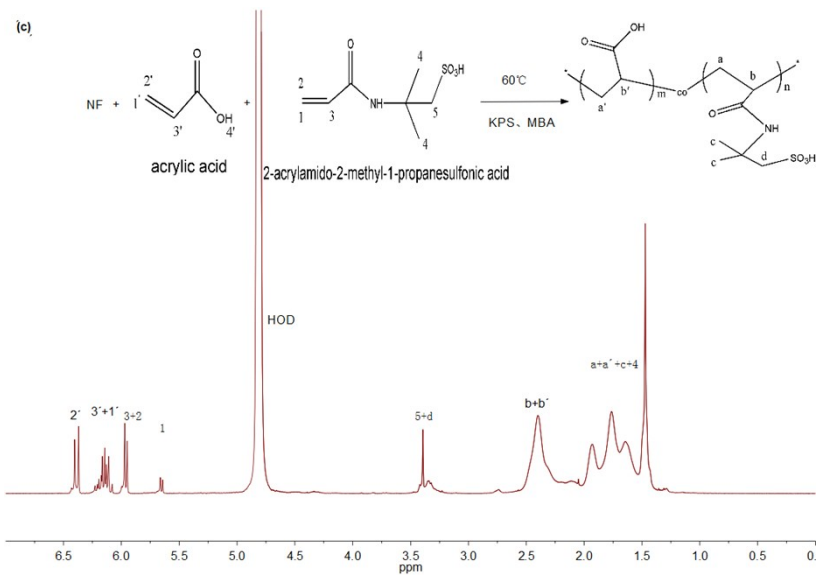

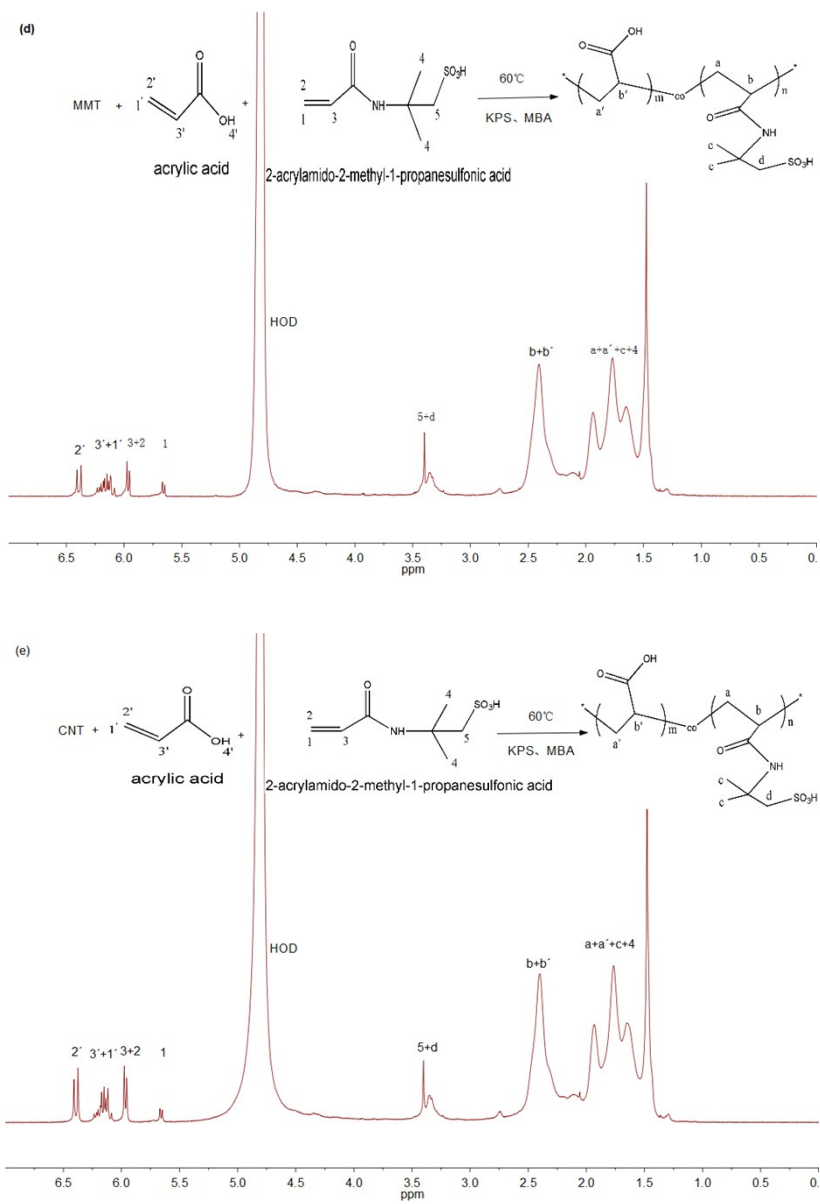

Figure S2  $^1\text{H}$  NMR spectra of monomer solution sample (a) and four as-polymerized samples (b-e).

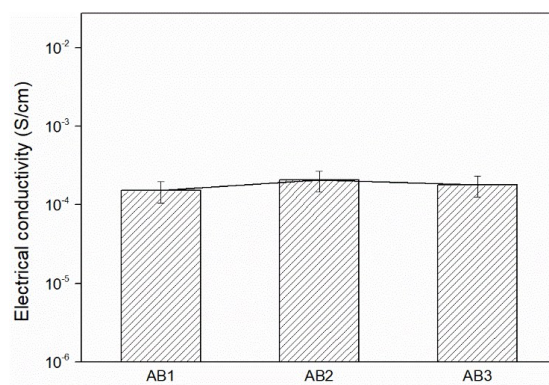

Figure S3 Electrical conductivity of three comparative hydrogels.

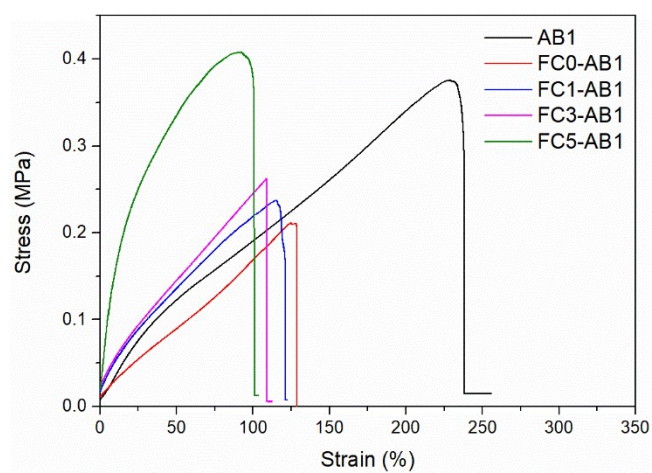

Figure S4 Tensile stress-strain curves of the comparative and targeted hydrogels.

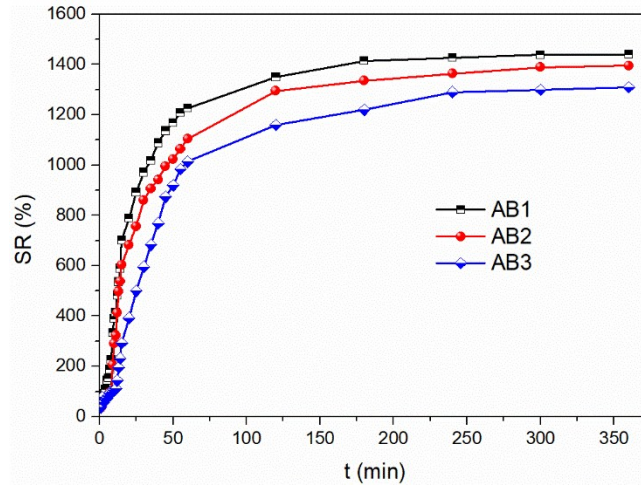

Figure S5 Equilibrium swelling process of comparison hydrogels in deionized water.

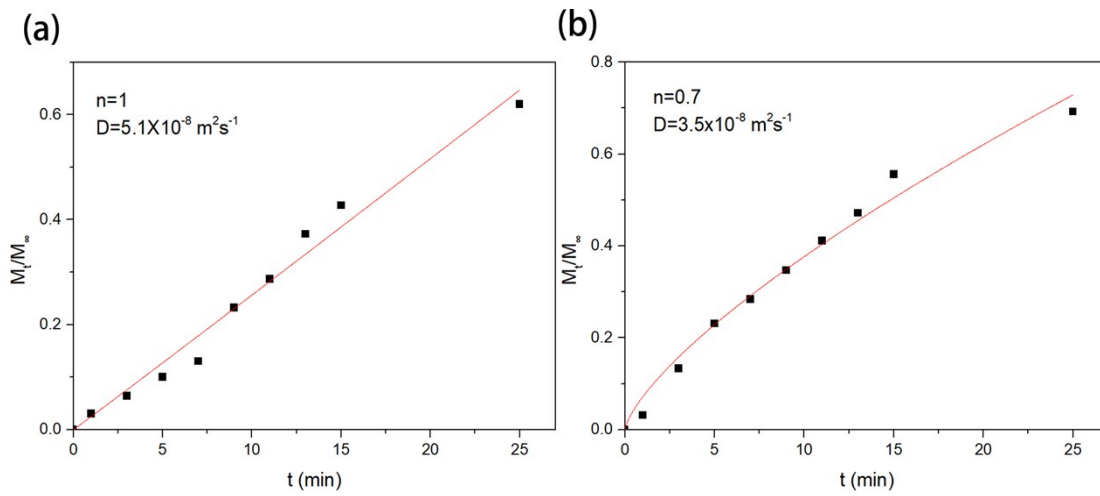

Figure S6 Dependence of the water fractional content ( $M_t/M_\infty$ ) on the time for AB1 (a) and FC5-AB1 (b) hydrogels.

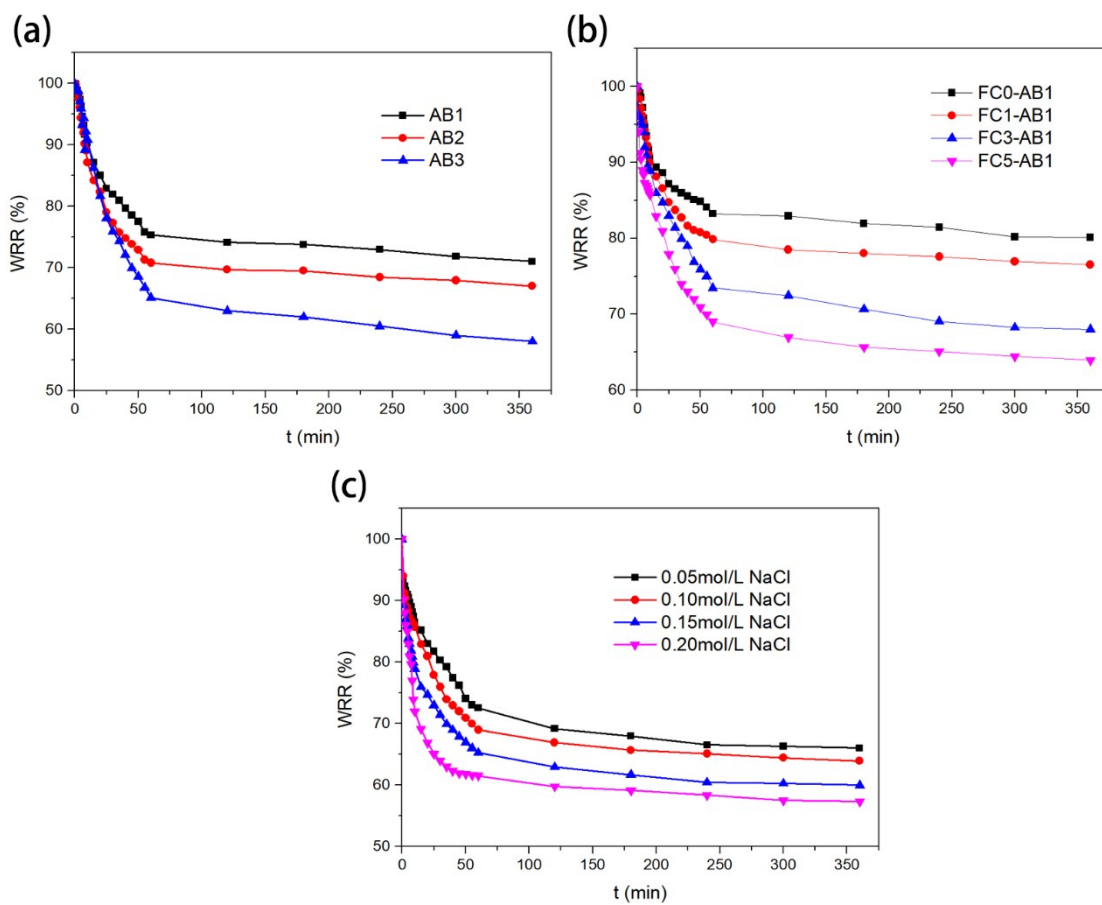

Figure S7 Water retention performance of hydrogels in NaCl solution. (a, b) in 0.10 mol•L<sup>-1</sup> NaCl solution, (c) FC5-AB1.

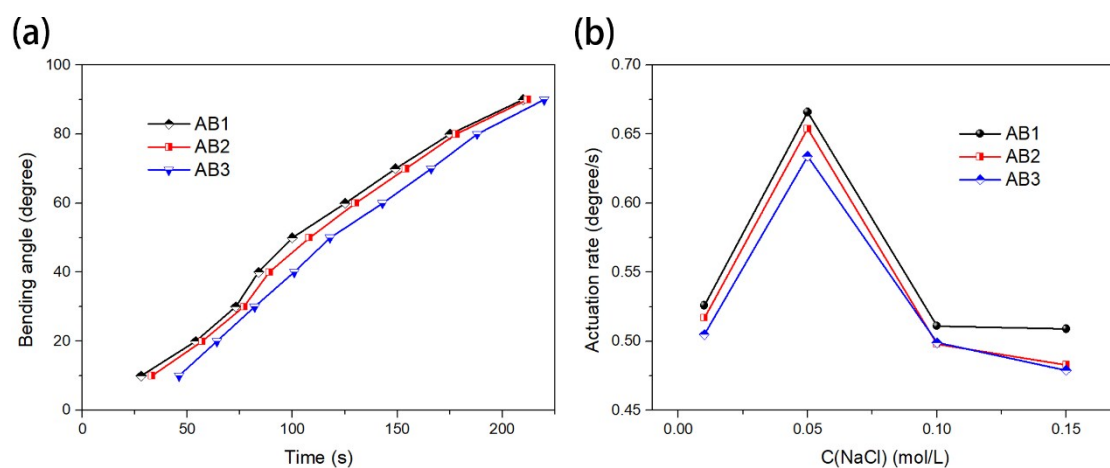

Figure S8 (a) Bending behavior of comparison samples AB1, AB2 and AB3 hydrogels in 0.05 mol•L<sup>-1</sup> NaCl solution under an applied electric field of 375 V•m<sup>-1</sup>, (b) Effect of the ionic strength on the actuation rate for comparison samples AB1, AB2 and AB3 hydrogels.
